# Supplementary material
Source: PubMed Central journal article supplement (PMC4815443)
Supplement: hdy20152x1.pdf [file hdy20152x1.pdf]

Table S1

| Table S1: Primers, PCR cycling conditions, and references used for diagnostic PCR detection of endosymbionts, DNA quality control, and CO1 barcoding |          |                       |                                                                |                              |                                                                                                   |
|------------------------------------------------------------------------------------------------------------------------------------------------------|----------|-----------------------|----------------------------------------------------------------|------------------------------|---------------------------------------------------------------------------------------------------|
| Target Symbiont or DNA                                                                                                                               | Gene     | Primer name           | Primer sequence 5' to 3'                                       | References                   | PCR cycling conditions                                                                            |
| <i>Rickettsia</i>                                                                                                                                    | 16S      | RKlongF<br>RKlong R   | ACGTGGGAATCTACCCATCA<br>TAGCCTAGATGACGCGCTTC                   | this study                   | 95°C for 2 m, followed by 35 cycles consisting of 92°C for 30 s, 60°C for 30 s, and 72°C for 30 s |
| <i>Rickettsia</i>                                                                                                                                    | 16S      | RICS741F<br>RICT1197R | CATCCGGAGCTAATGGTTTGC<br>CATTTCCTCCATTGTGCCATC                 | Davis et al. 1998            | 95°C for 2 m, followed by 35 cycles consisting of 92°C for 30 s, 60°C for 30 s, and 72°C for 30 s |
| <i>Wolbachia</i>                                                                                                                                     | wsp      | MFwspF<br>MFwspR      | TGGCTGGTGGTGGTGCCTTT<br>CGTACTCCAGCTTCTGCACCA                  | this study                   | 95°C for 2 m, followed by 35 cycles consisting of 92°C for 30 s, 66°C for 30 s, and 72°C for 30 s |
| <i>Wolbachia</i>                                                                                                                                     | wsp      | wsp81F<br>wsp691R     | TGGTCCATAAGTGATGAAGAACTAGCTA<br>AAAAATTAAACGCTACTCCAGCTTCTGCAC | Zhou et al. 1998             | 95°C for 2 m, followed by 35 cycles consisting of 92°C for 30 s, 66°C for 30 s, and 72°C for 30 s |
| <i>Cardinium</i>                                                                                                                                     | 16S      | ChF<br>ChR            | TACTGTAAGAATAAGCACCGGC<br>GTGGATCACTTAACGCTTTTCG               | Zchori-Fein and Perlman 2004 | 94°C for 3 m, followed by 40 cycles consisting of 94°C for 30 s, 56°C for 45 s, and 72°C for 1 m  |
| <i>COI</i>                                                                                                                                           | COI      | lco1490<br>hco700     | GGTCAACAAATCATAAAGATATTGG<br>TCAGGGTGACCAAAAAATCA              | Folmer et al. 1994           | 94°C for 3 m, followed by 35 cycles consisting of 94°C for 30 s, 53°C for 30 s, and 72°C for 1 m  |
| Eukaryote                                                                                                                                            | 18S rDNA | NSF 18<br>NSF 19      | CTGGTTGATYCTGCCAGT<br>TCTCAGGCTCCYCTCCGG                       | Duron et al. 2008            | 94°C for 4 m, followed by 35 cycles consisting of 94°C for 1 m, 55°C for 1 m, and 72°C for 1 m    |

## Table S1 References

Davis MJ, Ying Z, Brunner BR, Pantoja A, Ferwerda FH (1998). Rickettsial relative associated with papaya bunchy top disease. *Curr Microbiol* **36**: 80-84.

Duron O, Bouchon D, Boutin S, Bellamy L, Zhou LQ, Engelstädter J *et al* (2008). The diversity of reproductive parasites among arthropods: *Wolbachia* do not walk alone. *BMC Biol* **6**: 12.

Folmer O, Black M, Hoeh W, Lutz R, Vrijenhoek R (1994). DNA primers for amplification of mitochondrial cytochrome c oxidase subunit I from diverse metazoan invertebrates. *Mol Mar Bio Biotech* **3**: 294.

Zchori-Fein E, Perlman SJ (2004). Distribution of the bacterial symbiont *Cardinium* in arthropods. *Mol Ecol* **13**: 2009-2016.

Zhou W, Rousset F, O'Neill S (1998). Phylogeny and PCR-based classification of *Wolbachia* strains using wsp gene sequences. *P Roy Soc Lond B Bio* **265**: 509-515.
