# Supplementary material
Source: PubMed Central journal article supplement (PMC4815443)
Supplement: hdy20152x2.pdf [file hdy20152x2.pdf]

**'read-me' file containing file descriptions**

File 1: (Table S1) Primers, PCR cycling conditions, and references used for diagnostic PCR detection of endosymbionts, DNA quality control, and CO1 barcoding.
