# Supplementary material
Source: PubMed Central journal article supplement (PMC4815443)
Supplement: hdy20152x4.pdf [file hdy20152x4.pdf]

Table S1

| Table S1: Primers, PCR cycling conditions, and references used for diagnostic PCR detection of endosymbionts, DNA quality control, and CO1 barcoding |          |                       |                                                                |                              |                                                                                                   |
|------------------------------------------------------------------------------------------------------------------------------------------------------|----------|-----------------------|----------------------------------------------------------------|------------------------------|---------------------------------------------------------------------------------------------------|
| Target Symbiont or DNA                                                                                                                               | Gene     | Primer name           | Primer sequence 5' to 3'                                       | References                   | PCR cycling conditions                                                                            |
| <i>Rickettsia</i>                                                                                                                                    | 16S      | RKlongF<br>RKlong R   | ACGTGGGAATCTACCCATCA<br>TAGCCTAGATGACCGCCTTC                   | this study                   | 95°C for 2 m, followed by 35 cycles consisting of 92°C for 30 s, 60°C for 30 s, and 72°C for 30 s |
| <i>Rickettsia</i>                                                                                                                                    | 16S      | RICS741F<br>RICT1197R | CATCCGGAGCTAATGGTTTGC<br>CATTTCCTTCCATTGTGCCATC                | Davis et al. 1998            | 95°C for 2 m, followed by 35 cycles consisting of 92°C for 30 s, 60°C for 30 s, and 72°C for 30 s |
| <i>Wolbachia</i>                                                                                                                                     | wsp      | MFwspF<br>MFwspR      | TGGCTGGTGGTGGTGCCTTT<br>CGCTACTCCAGCTTCTGCACCA                 | this study                   | 95°C for 2 m, followed by 35 cycles consisting of 92°C for 30 s, 66°C for 30 s, and 72°C for 30 s |
| <i>Wolbachia</i>                                                                                                                                     | wsp      | wsp81F<br>wsp691R     | TGGTCCATAAGTGATGAAGAACTAGCTA<br>AAAAATTAAACGCTACTCCAGCTTCTGCAC | Zhou et al. 1998             | 95°C for 2 m, followed by 35 cycles consisting of 92°C for 30 s, 66°C for 30 s, and 72°C for 30 s |
| <i>Cardinium</i>                                                                                                                                     | 16S      | ChF<br>ChR            | TACTGTAAGAATAAGCACCGGC<br>GTGGATCACTTAACGCTTTTCG               | Zchori-Fein and Perlman 2004 | 94°C for 3 m, followed by 40 cycles consisting of 94°C for 30 s, 56°C for 45 s, and 72°C for 1 m  |
| <i>COI</i>                                                                                                                                           | COI      | lco1490<br>hco700     | GGTCAACAAATCATAAAGATATTGG<br>TCAGGGTGACCAAAAAATCA              | Folmer et al. 1994           | 94°C for 3 m, followed by 35 cycles consisting of 94°C for 30 s, 53°C for 30 s, and 72°C for 1 m  |
| Eukaryote                                                                                                                                            | 18S rDNA | NSF 18<br>NSF 19      | CTGGTTGATYCTGCCAGT<br>TCTCAGGCTCCYTCTCCGG                      | Duron et al. 2008            | 94°C for 4 m, followed by 35 cycles consisting of 94°C for 1 m, 55°C for 1 m, and 72°C for 1 m    |

Table S1 References

Davis MJ, Ying Z, Brunner BR, Pantoja A, Ferwerda FH (1998). Rickettsial relative associated with papaya bunchy top disease. *Curr Microbiol* **36**: 80-84.

Duron O, Bouchon D, Boutin S, Bellamy L, Zhou LQ, Engelstädter J *et al* (2008). The diversity of reproductive parasites among arthropods: *Wolbachia* do not walk alone. *BMC Biol* **6**: 12.

Folmer O, Black M, Hoeh W, Lutz R, Vrijenhoek R (1994). DNA primers for amplification of mitochondrial cytochrome c oxidase subunit I from diverse metazoan invertebrates. *Mol Mar Bio Biotech* **3**: 294.

Zchori-Fein E, Perlman SJ (2004). Distribution of the bacterial symbiont *Cardinium* in arthropods. *Mol Ecol* **13**: 2009-2016.

Zhou W, Rousset F, O'Neill S (1998). Phylogeny and PCR-based classification of *Wolbachia* strains using wsp gene sequences. *P Roy Soc Lond B Bio* **265**: 509-515.

Table S2a Distance matrix of genetic similarity (%) among *Rickettsia* strains in both *Mermessus* surveys as determined by sequencing 673bp of bacterial 16S rRNA

|                        |                | <i>M. fradeorum</i> | <i>Mermessus</i> genus |                |                |                |                |
|------------------------|----------------|---------------------|------------------------|----------------|----------------|----------------|----------------|
|                        |                | R <sub>1</sub>      | R <sub>2</sub>         | R <sub>3</sub> | R <sub>4</sub> | R <sub>5</sub> | R <sub>6</sub> |
| <i>M. fradeorum</i>    | R <sub>1</sub> | 100                 | 95.9                   | 99.5           | 99.1           | 99.3           | 98.9           |
| <i>Mermessus</i> genus | R <sub>2</sub> |                     | 100                    | 95.8           | 95.6           | 95.9           | 95.6           |
|                        | R <sub>3</sub> |                     |                        | 100            | 99.3           | 99.5           | 99.1           |
|                        | R <sub>4</sub> |                     |                        |                | 100            | 99.1           | 98.8           |
|                        | R <sub>5</sub> |                     |                        |                |                | 100            | 99.6           |
|                        | R <sub>6</sub> |                     |                        |                |                |                | 100            |

Table S2b Distance matrix of genetic similarity (%) among *Wolbachia* strains in both *Mermessus* surveys as determined by sequencing 561bp of the *Wolbachia* *wsp* gene

|                        |                | <i>M. fradeorum</i> |                | <i>Mermessus</i> genus |                |                |
|------------------------|----------------|---------------------|----------------|------------------------|----------------|----------------|
|                        |                | W <sub>1</sub>      | W <sub>2</sub> | W <sub>3</sub>         | W <sub>4</sub> | W <sub>5</sub> |
| <i>M. fradeorum</i>    | W <sub>1</sub> | 100                 | 91.2           | 90.5                   | 77.8           | 86.1           |
|                        | W <sub>2</sub> |                     | 100            | 92.9                   | 78.7           | 90.0           |
| <i>Mermessus</i> genus | W <sub>3</sub> |                     |                | 100                    | 79.9           | 86.1           |
|                        | W <sub>4</sub> |                     |                |                        | 100            | 75.9           |
|                        | W <sub>5</sub> |                     |                |                        |                | 100            |

Table S2c Distance matrix of genetic similarity (%) among *Cardinium* strains in the *Mermessus* genus survey as determined by sequencing 333bp of bacterial 16S rRNA

|                | C <sub>1</sub> | C <sub>2</sub> | C <sub>3</sub> |
|----------------|----------------|----------------|----------------|
| C <sub>1</sub> | 100            | 98.8           | 97.6           |
| C <sub>2</sub> |                | 100            | 98.5           |
| C <sub>3</sub> |                |                | 100            |

Figure S1

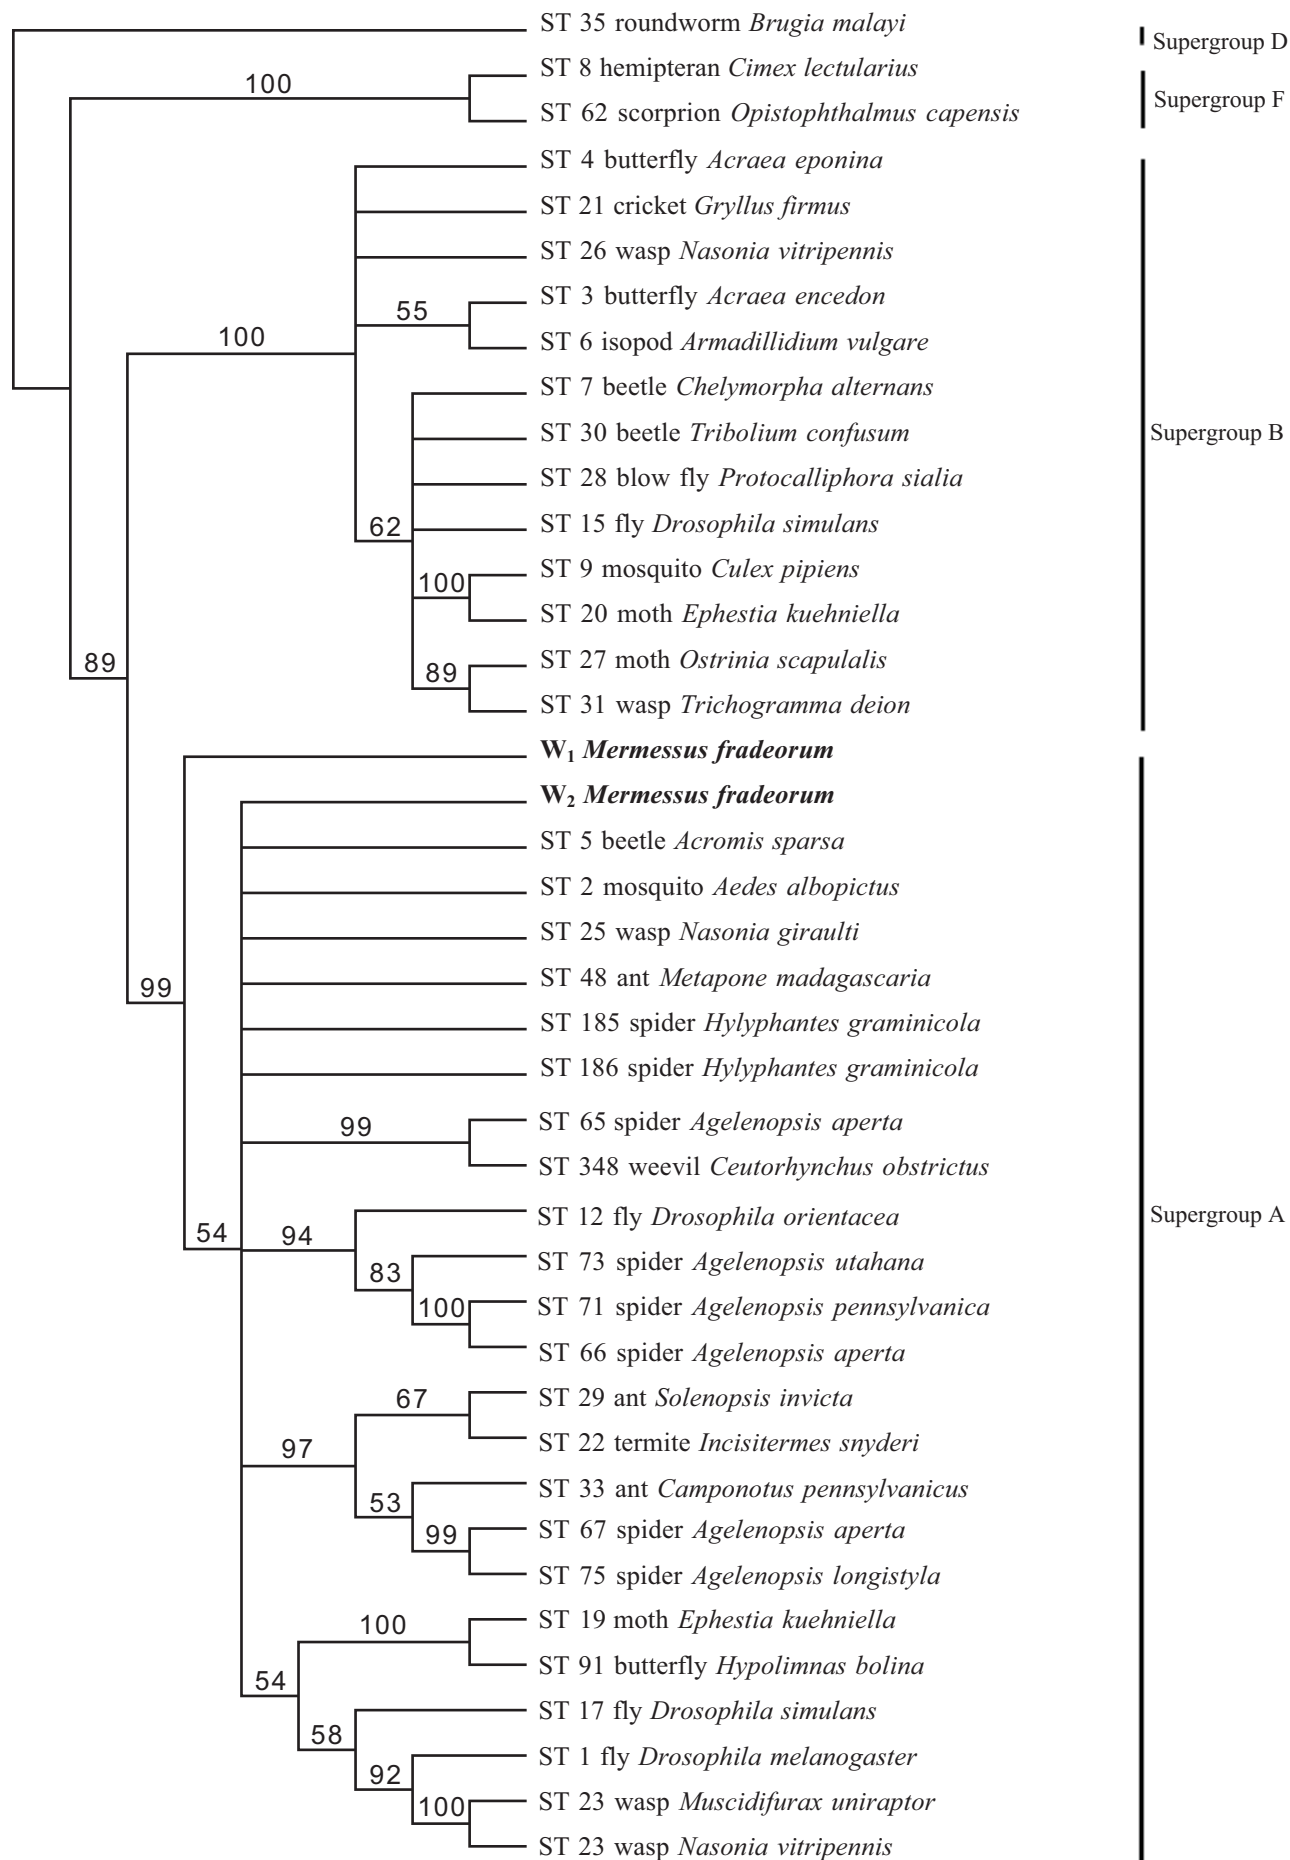

## Supplementary File 4: Modeling Notes

We modified the Hoffman-Turelli model (Turelli, 1994; Turelli and Hoffman 1995) to incorporate an independent female-biasing symbiont in the population, in addition to a symbiont inducing cytoplasmic incompatibility (CI). For the purposes of this exercise, we assumed that female biasing (FB) was complete: FB symbionts are only found in females, and all offspring that carry this symbiont are female. The result is that there are three types of females in the population (females carrying the CI symbiont, females carrying the FB symbiont and uninfected females) and two types of males (males carrying the CI symbiont and uninfected males). Therefore, the proportion of CI -infected females and males in the population were not the same, and we kept track of females and males separately, similar to Vavre et al (2000). Note that the model is applicable to a broader set of female-biasing mechanisms than just feminization, based on the parameter values selected.

We used the following parameters:

- 1)  $F_{CI}$  = The proportional fecundity of CI-carrying females, relative to uninfected females
- 2)  $\mu_{CI}$  = The proportional rate of failure to transmit the CI symbiont, resulting in uninfected offspring
- 3)  $H_U$  = The proportional offspring production of uninfected females when mated to CI males. Reflects incomplete penetrance of CI.
- 4)  $F_{FB}$  = The proportional fecundity of FB-carrying females, relative to uninfected females
- 5)  $\mu_{FB}$  = The proportional rate of failure to transmit the FB symbiont, resulting in uninfected offspring
- 6)  $H_{FB}$  = The proportional offspring production of FB females when mated to CI males. Reflects incomplete penetrance of CI.
- 7)  $s$  = The proportion female offspring produced by the non-FB females. For FB females,  $s=1$ .

The first three parameters are those of the Turelli-Hoffman model, with subscripts added to specify that they refer to features of the CI-carrying or uninfected individuals. We added three parallel parameters for the FB carrying symbionts, allowing the FB symbiont to impose different fecundity costs, and have a different vertical transmission efficiency than the CI symbiont. We additionally allowed CI to have different penetrance in FB carrying individuals than uninfected individuals using the parameter  $H_{FB}$ . Finally, we used the parameter  $s$  to indicate the proportion of female offspring produced by the non-FB females. Because the ultimate value of interest, from the perspective of a maternally-inherited symbiont, is the proportion of the female population that is infected,  $s$  represents the cost of producing males by the non-FB mothers. We generated the following recursion equations to track the proportion of

females that carried CI, FB or were uninfected, and the proportion of males carrying CI versus uninfected.

$$f_{CI,t+1} = \frac{f_{CI,t}F_{CI}(1 - \mu_{CI})s}{f_{CI,t}F_{CI}s(1 + \mu_{CI}(m_{U,t} + m_{CI,t}H_U - 1)) + f_{FB}F_{FB}[m_{U,t}(1 + \mu_{FB}(s - 1)) + m_{CI,t}H_{FB}(1 + \mu_{FB}(s - 1))] + f_{U,t}s(m_{U,t} + m_{CI,t}H_U)}$$

$$f_{FB,t+1} = \frac{f_{FB,t}m_{U,t}F_{FB}(1 - \mu_{FB}) + f_{FB,t}m_{CI,t}F_{FB}H_{FB}(1 - \mu_{FB})}{f_{CI,t}F_{CI}s(1 + \mu_{CI}(m_{U,t} + m_{CI,t}H_U - 1)) + f_{FB}F_{FB}[m_{U,t}(1 + \mu_{FB}(s - 1)) + m_{CI,t}H_{FB}(1 + \mu_{FB}(s - 1))] + f_{U,t}s(m_{U,t} + m_{CI,t}H_U)}$$

$$f_{U,t+1} = 1 - f_{CI,t+1} - f_{FB,t+1}$$

$$m_{CI,t+1} = \frac{f_{CI,t}F_{CI}(1 - \mu_{CI})}{f_{CI,t}F_{CI}(1 + \mu_{CI}(m_{U,t} + m_{CI,t}H_U - 1)) + f_{FB}F_{FB}\mu_{FB}(m_{U,t} + m_{CI,t}H_{FB}) + f_{U,t}(m_{U,t} + m_{CI,t}H_U)}$$

$$m_{U,t+1} = 1 - m_{CI,t+1}$$

We find that when both manipulators have minimal fecundity costs and high vertical transmission, as we observed in our laboratory assays, the expectation is that one or the other symbiont is driven out of the population, whereas the other reaches near fixation. Which manipulation dominates depends on the level of CI penetrance, particularly in female biasing symbiont ( $H_{FB}$ ). If  $H_{FB}$  is low and CI penetrance in FB carrying-females is strong, the CI symbiont will dominate, whereas if  $H_{FB}$  is high and CI penetrance in FB carrying females is weak, the FB symbiont will dominate. This result is robust across a large range of  $H_U$  values; when  $H_U$  is also very high, the CI symbiont would not be sustained in the population even in the absence of the FB symbiont.

Supplementary Excel file 5, which allows exploration of the model, is included.

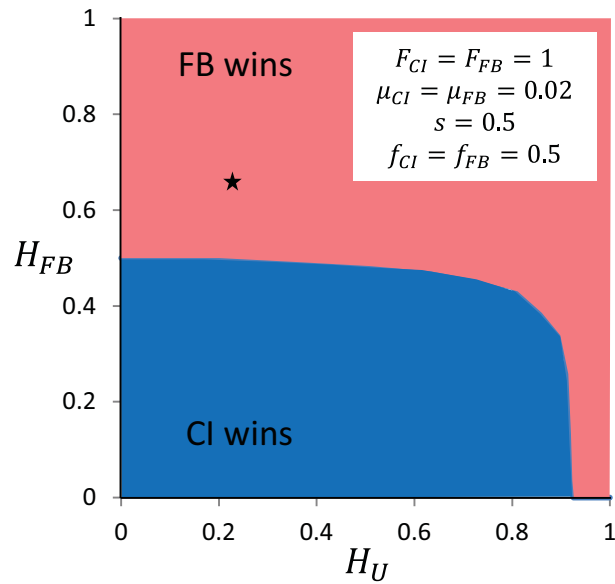

(The star represents our point estimates of  $H_U$  and  $H_{FB}$  based on laboratory studies).

#### Supplementary File 4 and 5 References

Turelli M (1994). Evolution of incompatibility-inducing microbes and their hosts. *Evolution* **48**: 1500-1513.

Turelli M, Hoffmann AA (1995). Cytoplasmic incompatibility in *Drosophila simulans*: dynamics and parameter estimates from natural populations. *Genetics* **140**: 1319-1338.

Vavre F, Fleury F, Varaldi J, Fouillet P, Bouletreau M (2000). Evidence for female mortality in *Wolbachia*-mediated cytoplasmic incompatibility in haplodiploid insects: epidemiologic and evolutionary consequences. *Evolution* **54**: 191-200.
